# Supplementary material
Source: Springer Nature journal article supplement (https://www.springermedizin.de/resource/supplementary/12961_2009_146_MOESM4_ESM.pdf/9571538)

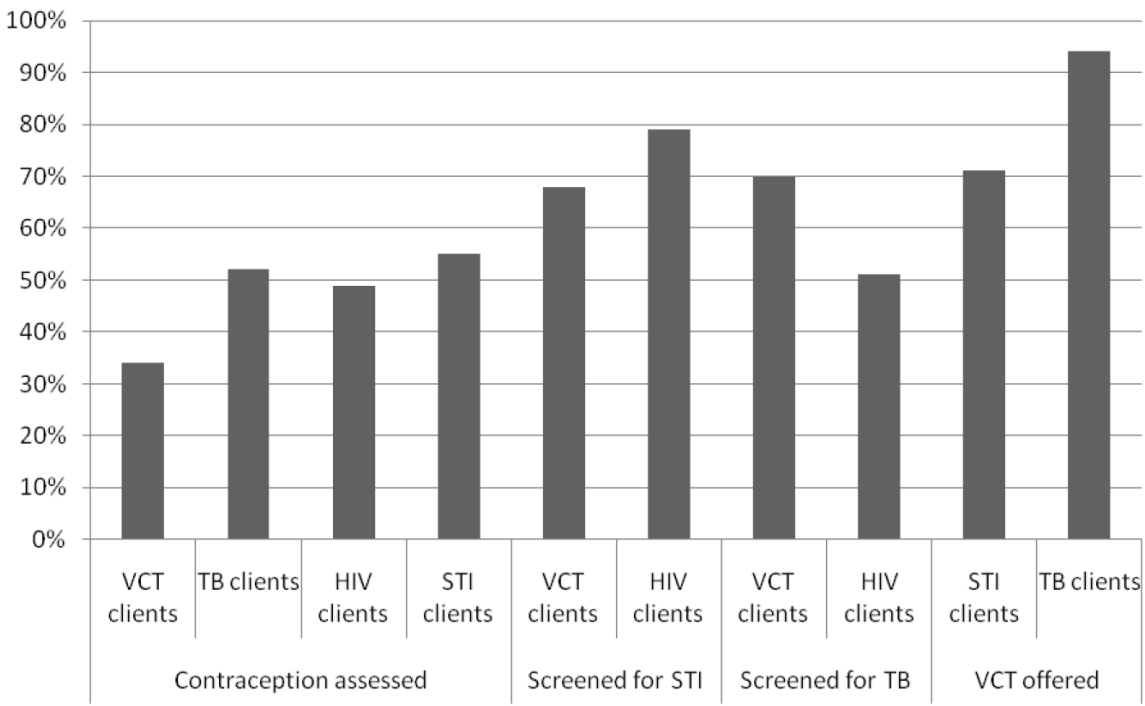

Supplement: MOESM4 [file 9571538]
